# Supplementary material
Source: Springer Nature journal article supplement (https://www.springermedizin.de/resource/supplementary/13023_2013_600_MOESM4_ESM.pdf/9642826)
Supplement: MOESM4 [file 9642826]

|     |                                                           |     |             |
|-----|-----------------------------------------------------------|-----|-------------|
| 1   | ---MESTLGAGIVIAEALQNQLAWLENVWLWITFLGDPKILFLFYFPAAYYASRRV  | 56  | G6PC3_HUMAN |
| 1   | MEEGMNVLHDFGIQSTHYLQVNYQDSQDWFILVSVIADLRNAFYVLFPIWFLH     | 60  | G6PC_HUMAN  |
|     | *: ** :. ** : : : : : : : * : * . ** :: .. ***            |     |             |
| 57  | VLWISLITEWLNLIKWFVLFGRPFVWVHESGYYSQAPA-QVHQFPSSCETGPG     | 115 | G6PC3_HUMAN |
| 61  | LLWVAVIGDWLNLVFKWILFGQRPYVWVLDTDYYSNTSVPLIKQFPVTCET       | 120 | G6PC_HUMAN  |
|     | :***:::* :*****:***:***:***:*** : : ***: . :*** :*****.   |     |             |
| 116 | MITGAALWPIMTALSS---QVATRARSRWVRVMPSLAYCTFLAVGLSRIFILA     | 171 | G6PC3_HUMAN |
| 121 | HFPHQ MGTAGVYYVMVTSTLSIFQGKIKPTYRFRCLNVILWLGFVAVQLNVCL    | 180 | G6PC_HUMAN  |
|     | * * . . . : : * : * : * : * : * : * : * : * : * : * : *   |     |             |
| 172 | VLAGLITGAVLGWLMTPRVPM-EREFSFYGLTALALMLGTSLIYWTLFTLGL      | 230 | G6PC3_HUMAN |
| 181 | DLSWSISL VVAGVLSGIAVAETFSHIHSIYNASLKKYFLITFFLFSFAIGFY     | 240 | G6PC_HUMAN  |
|     | *:***:::* .. : : : . * * : : * : : * * **:* * : : .       |     |             |
| 231 | AFKWCERPEWIHVDSRPFASLSRDSGAALGLGIALHSPCYAQVRRRAQLGNG      | 288 | G6PC3_HUMAN |
| 241 | Q--KIACLV AQRWCEQPEVWHIDTTPFASLLKNLGTFLGLLALNSSMYRES      | 300 | G6PC_HUMAN  |
|     | * :***:***:***:***: ***** : : * : :***:***.* * : : : * .  |     |             |
| 289 | LAMGLLGPLDWLGHPPQIS-LFYIFNFLKYTLWPCLVLALVPWAVHMFSAQE      | 346 | G6PC3_HUMAN |
| 301 | APPVHSS ASLVLLHVFDSLKPPSQVELVFYVLSFCKSAVVPLASVSVIPYCLA    | 357 | G6PC_HUMAN  |
|     | : : * * : * * * * : . :***: . * * : : * : : : * : : . . * |     |             |
